# Supplementary material
Source: PubMed Central journal article supplement (PMC4949951)
Supplement: NIHMS801757-supplement-supplement_1.pdf [file NIHMS801757-supplement-supplement_1.pdf]

**Supplementary Table 1.** Fit statistics for the models of cognitive scores over 6-year follow-up period (n=4,926)

| Cognitive score                     | Type of adjustment         | -2 Log Likelihood | Likelihood Ratio Chi-Square test p-value * | AIC**    |
|-------------------------------------|----------------------------|-------------------|--------------------------------------------|----------|
| Global composite score <sup>a</sup> | Basic <sup>b</sup>         | 27304.5           |                                            | 27348.5  |
|                                     | Multivariable <sup>c</sup> | 27028.9           | <0.001                                     | 27288.9  |
| TICS                                | Basic <sup>b</sup>         | 83670.1           |                                            | 83714.1  |
|                                     | Multivariable <sup>c</sup> | 83397.8           | <0.001                                     | 83657.8  |
| Verbal memory <sup>a</sup>          | Basic <sup>b</sup>         | 34354.7           |                                            | 34398.7  |
|                                     | Multivariable <sup>c</sup> | 34125.9           | <0.001                                     | 34385.9  |
| Category fluency                    | Basic <sup>b</sup>         | 101067.7          |                                            | 101111.7 |
|                                     | Multivariable <sup>c</sup> | 100844.1          | <0.001                                     | 101104.1 |
| Digit Span Backward                 | Basic <sup>b</sup>         | 73471.7           |                                            | 73515.7  |
|                                     | Multivariable <sup>c</sup> | 73309.0           | <0.001                                     | 73569.0  |

\* -2 Log Likelihood ratio chi-square tests comparing the model fit between the basic-adjusted versus the multivariable models (nested models) with 108 degrees of freedom

\*\*Akaike's Information Criterion (AIC): smaller values indicate better model fit

<sup>a</sup> Global composite score is the average of the z-scores of the TICS, delayed recall of the TICS 10-word list, immediate and delayed recalls of the East Boston Memory Test, category fluency and digit span backward; verbal memory composite score is the average of the z-scores of the immediate and delayed recalls of both the TICS 10-word and the East Boston Memory Test

<sup>b</sup> Basic-adjusted as indicated in footnote b of Table 3; the number of fixed effects parameters is 18

<sup>c</sup> Multivariable-adjusted as indicated in footnote c of Table 3; the number of fixed effects parameters is 126

**Supplementary Table 2.** Select fixed effects (95% confidence intervals) estimates in the multivariable-adjusted model<sup>a</sup> of the global composite score<sup>b</sup> over 6-year follow-up period (n=4,926)

| Fixed Effect                  | Estimate (95% CI)      | p-value |
|-------------------------------|------------------------|---------|
| Intercept                     | 2.330 (1.490, 3.169)   | <0.001  |
| Time                          | 0.359 (0.179, 0.539)   | <0.001  |
| Worse QOL at retirement       | -0.037 (-0.099, 0.024) | 0.24    |
| Same QOL at retirement        | 0 (Ref)                | -       |
| Better QOL at retirement      | 0.013 (-0.020, 0.047)  | 0.43    |
| Worse QOL at retirement*Time  | 0.006 (-0.007, 0.02)   | 0.37    |
| Same QOL at retirement*Time   | 0 (Ref)                | -       |
| Better QOL at retirement*Time | 0.011 (0.004, 0.019)   | 0.002   |

<sup>a</sup> Multivariable-adjusted as indicated in footnote c of Table 3

<sup>b</sup> Global composite score is the average of the z-scores of the TICS, delayed recall of the TICS 10-word list, immediate and delayed recalls of the East Boston Memory Test, category fluency and digit span backward
